# Supplementary material for: A Preliminary Investigation of Special Types of Honey Marketed in Morocco
Source: MDPI journal article supplement (doi:10.3390/jeta1010001), 2023-01-05
Supplement: s1 [file s1]

**Table S1.** Analytical parameters for method validation in multi-element analysis.

| <b>Pine Needles Nist 1575</b> |                                              |                                              |                         |                                       |                                                      |                         |
|-------------------------------|----------------------------------------------|----------------------------------------------|-------------------------|---------------------------------------|------------------------------------------------------|-------------------------|
| <b>Element</b>                | <b>LOD<br/>(<math>\mu\text{g/Kg}</math>)</b> | <b>LOQ<br/>(<math>\mu\text{g/Kg}</math>)</b> | <b><math>R^2</math></b> | <b>Experimental<br/>Value (mg/kg)</b> | <b>Linear Range<br/>(<math>\mu\text{g/L}</math>)</b> | <b>Recovery<br/>(%)</b> |
| <b>Li</b>                     | 0.001                                        | 0.003                                        | 0.9998                  | 1.95 *                                | 0.5–50.0                                             | 97.50                   |
| <b>B</b>                      | 0.003                                        | 0.010                                        | 0.9997                  | 9.1                                   | 0.5–50.0                                             | 94.79                   |
| <b>Na</b>                     | 0.461                                        | 1.521                                        | 0.9982                  | 60.00                                 | 0.5–50.0                                             | 95.24                   |
| <b>Mg</b>                     | 0.031                                        | 0.102                                        | 0.9992                  | 0.103                                 | 0.5–50.0                                             | 97.17                   |
| <b>Al</b>                     | 0.021                                        | 0.069                                        | 0.9996                  | 566                                   | 0.5–50.0                                             | 97.59                   |
| <b>K</b>                      | 0.142                                        | 0.469                                        | 0.9989                  | 0.380                                 | 0.5–50.0                                             | 91.13                   |
| <b>Cr</b>                     | 0.001                                        | 0.003                                        | 0.9998                  | 0.38                                  | 0.5–50.0                                             | 95.00                   |
| <b>Mn</b>                     | 0.002                                        | 0.007                                        | 0.9997                  | 478                                   | 0.5–50.0                                             | 97.95                   |
| <b>Fe</b>                     | 0.021                                        | 0.069                                        | 0.9996                  | 43.5                                  | 0.5–50.0                                             | 94.57                   |
| <b>Ni</b>                     | 0.001                                        | 0.003                                        | 0.9998                  | 1.43                                  | 0.5–50.0                                             | 97.28                   |
| <b>Cu</b>                     | 0.014                                        | 0.046                                        | 0.9993                  | 2.7                                   | 0.5–50.0                                             | 96.43                   |
| <b>Zn</b>                     | 0.027                                        | 0.089                                        | 0.9992                  | 37.45                                 | 0.5–50.0                                             | 98.55                   |
| <b>As</b>                     | 0.001                                        | 0.003                                        | 0.9997                  | 0.040                                 | 0.5–50.0                                             | 102.56                  |
| <b>Se</b>                     | 0.042                                        | 0.139                                        | 0.9991                  | 0.095                                 | 0.5–50.0                                             | 95.96                   |
| <b>Sr</b>                     | 0.003                                        | 0.010                                        | 0.9997                  | 1.99 *                                | 0.5–50.0                                             | 99.50                   |
| <b>Ca</b>                     | 0.002                                        | 0.007                                        | 0.9998                  | 2.00 *                                | 0.5–50.0                                             | 100.00                  |
| <b>Cd</b>                     | 0.001                                        | 0.003                                        | 0.9998                  | 0.225                                 | 0.5–50.0                                             | 96.57                   |
| <b>Sb</b>                     | 0.002                                        | 0.007                                        | 0.9997                  | 1.95 *                                | 0.5–50.0                                             | 97.50                   |
| <b>Ba</b>                     | 0.004                                        | 0.013                                        | 0.9997                  | 6.08                                  | 0.5–50.0                                             | 101.33                  |
| <b>Pb</b>                     | 0.002                                        | 0.007                                        | 0.9998                  | 0.170                                 | 0.5–50.0                                             | 101.80                  |
| <b>Hg</b>                     | 0.001                                        | 0.003                                        | 0.9998                  | 0.0404                                | 1.0–100                                              | 101.25                  |

\* Not present in the certified matrix, added later to the matrix.
